# Supplementary material for: A search for doxycycline-dependent mutations that increase Drosophila melanogaster life span identifies the VhaSFD, Sugar baby, filamin, fwd and Cctlgenes
Source: Springer Nature journal article supplement (doi:10.1186/gb-2003-4-2-r8), 2003-01-30
Supplement: Additional file 1 [file gb-2003-4-2-r8-s1.doc]

Supplementary Table. Calculations of 95% confidence intervals.

*Pairwise Comparisons for Data set #1 (lines crossed to rtTA(3)E2)*

|  | **Mean Difference**  **((+DOX) –**  **(-DOX))** | Std. Error | **Sig.** | **95% Confidence Interval for Difference** |  |
| --- | --- | --- | --- | --- | --- |
| **LINE#** |  |  |  | Lower Bound | Upper Bound |
| **PDL(3)2C21** | 2.276 | 1.535 | .138 | 5.285 | -.733 |
| **PDL(3)4G17** | 3.379 | 1.541 | .028 | 6.399 | .359 |
| **PDL(3)1A7** | -2.874 | 1.533 | .061 | .130 | -5.879 |
| **PDL(3)1B5** | 2.434 | 1.557 | .118 | 5.487 | -.618 |
| **PDL(3)1A10** | 4.166 | 1.653 | .012 | 7.407 | .925 |
| **PDL(2)1A4** | 3.706 | 1.533 | .016 | 6.711 | .702 |
| **PDL(3)5k76** | 2.518 | 1.551 | .105 | 5.558 | -.522 |
| **PDL(3)5K175** | 4.364 | 1.553 | .005 | 7.407 | 1.320 |
| **PDL(3)6I15** | 1.612 | 1.551 | .299 | 4.652 | -1.428 |
| **PDL(3)6M67** | 4.043 | 1.545 | .009 | 7.071 | 1.015 |
| **PDL(3)6M172** | -1.308 | 1.545 | .397 | 1.720 | -4.336 |
| **PDL(3)5J95** | -2.563 | 1.551 | .099 | .478 | -5.603 |
| **PDL(2)5J47** | .764 | 1.570 | .627 | 3.841 | -2.313 |
| **PDL(2)5J19** | 4.359 | 1.667 | .009 | 7.625 | 1.093 |
| **PDL(3)6M167** | 3.371 | 1.570 | .032 | 6.449 | .294 |
| **PDL(3)6M115** | -1.084 | 1.606 | .500 | 2.065 | -4.232 |
| **PDL(3)4H5** | -.112 | 1.539 | .942 | 2.904 | -3.128 |
| **PDL(2)2D17** | -.472 | 1.521 | .756 | 2.509 | -3.453 |
| **PDL(2)3F22** | 1.412 | 1.529 | .356 | 4.409 | -1.584 |
| **PDL(2)4H11** | 4.536 | 1.603 | .005 | 7.678 | 1.394 |
| **PDL(3)1A5** | 4.626 | 1.557 | .003 | 7.678 | 1.574 |
| **PDL(3)5J20** | -2.638 | 1.570 | .093 | .439 | -5.715 |
| **PDL(3)2C50** | .156 | 1.583 | .922 | 3.258 | -2.947 |
| **PDL(3)3E6** | 3.252 | 1.581 | .040 | 6.352 | .153 |
| **PDL(3)3E36** | 3.926 | 1.556 | .012 | 6.975 | .877 |
| **PDL(2)3E9** | 2.074 | 1.592 | .192 | 5.194 | -1.045 |
| **PDL(2)6M33** | 4.339 | 1.596 | .007 | 7.468 | 1.210 |
| **PDL(3)3E37** | 6.096 | 1.578 | .000 | 9.190 | 3.002 |
| **PDL(3)2C36** | 5.323 | 1.561 | .001 | 8.383 | 2.262 |
| **PDL(2)4H3** | 2.944 | 1.572 | .061 | 6.026 | -.138 |
| **PDL(2)3F95** | 2.925 | 1.676 | .081 | 6.209 | -.360 |
| **PDL(2)2C6** | 6.003 | 1.572 | .000 | 9.085 | 2.922 |
| **PDL(3)4H4** | 3.541 | 1.561 | .023 | 6.601 | .480 |
| **PDL(3)6M177** | .632 | 1.578 | .689 | 3.724 | -2.460 |
| **PDL(3)4H6** | -.716 | 1.539 | .642 | 2.301 | -3.733 |
| **PDL(2)2D6** | 4.434 | 1.551 | .004 | 7.474 | 1.394 |
| **PDL(3)5K161** | -.360 | 1.541 | .815 | 2.660 | -3.379 |
| **PDL(3)3E2** | 1.194 | 1.499 | .426 | 4.133 | -1.745 |
| **PDL(3)2D40** | .802 | 1.537 | .602 | 3.814 | -2.210 |
| **PDL(2)1B2** | 4.502 | 1.553 | .004 | 7.546 | 1.458 |
| **PDL(3)4H13** | 3.386 | 1.584 | .033 | 6.492 | .281 |
| **PDL(3)3E53** | 4.878 | 1.548 | .002 | 7.912 | 1.845 |
| **PDL(3)3F44** | 5.609 | 1.551 | .000 | 8.649 | 2.569 |
| **PDL(3)3E10** | 1.716 | 1.562 | .272 | 4.779 | -1.346 |
| **PDL(3)3E30** | -.468 | 1.547 | .762 | 2.564 | -3.501 |
| **PDL(2)3F98** | 1.363 | 1.586 | .390 | 4.473 | -1.746 |
| **PDL(3)1A9** | 1.757 | 1.566 | .262 | 4.826 | -1.312 |
| **PDL(2)5K150** | 4.678 | 1.543 | .002 | 7.702 | 1.655 |
| **PDL(3)6L18** | 6.782 | 1.531 | .000 | 9.782 | 3.782 |
| **PDL(3)6M132** | 4.891 | 1.519 | .001 | 7.868 | 1.914 |
| ***PDL(2)3E22*** | *-5.907* | *1.553* | *.000* | *-2.863* | *-8.950* |
| ***PDL(2)6L66*** | *-3.252* | *1.528* | *.033* | *-.258* | *-6.247* |
| **PDL(2)2D20** | 2.599 | 1.539 | .091 | 5.614 | -.417 |
| **PDL(3)2D36** | 1.664 | 1.551 | .284 | 4.704 | -1.377 |
| **PDL(3)6M137** | -2.912 | 1.646 | .077 | .315 | -6.139 |
| **PDL(3)5K66** | -2.145 | 1.633 | .189 | 1.056 | -5.346 |
| **PDL(3)6M100** | -1.493 | 1.629 | .359 | 1.699 | -4.686 |
| **PDL(3)2D25** | -2.505 | 1.543 | .105 | .520 | -5.529 |
| **PDL(3)1B4** | -1.264 | 1.562 | .418 | 1.797 | -4.325 |
| **PDL(2)5K152** | 3.150 | 1.576 | .046 | 6.239 | 5.991E-02 |
| **PDL(3)3F112** | 1.017 | 1.613 | .528 | 4.179 | -2.144 |
| **PDL(2)5J35** | -2.010 | 1.525 | .187 | .978 | -4.999 |
| **PDL(3)1B3** | .458 | 1.621 | .778 | 3.634 | -2.719 |
| **PDL(2)2C42** | -2.811 | 1.647 | .088 | .417 | -6.039 |
| **PDL(2)5K45** | -.257 | 1.639 | .875 | 2.956 | -3.470 |
| **PDL(2)6M152** | 3.062 | 1.608 | .057 | 6.214 | -8.983E-02 |
| **PDL(2)6L42** | 3.436 | 1.610 | .033 | 6.591 | .280 |
| **PDL(3)4G9** | -2.720 | 1.605 | .090 | .426 | -5.866 |
| **PDL(3)4G2** | .646 | 1.504 | .667 | 3.594 | -2.301 |
| **PDL(2)2D33** | 1.515 | 1.543 | .326 | 4.539 | -1.509 |
| **PDL(3)3F49** | 2.435 | 1.517 | .109 | 5.408 | -.539 |
| **PDL(3)5J26** | .763 | 1.505 | .612 | 3.713 | -2.188 |
| **PDL(3)4H27** | 1.537 | 1.535 | .317 | 4.545 | -1.471 |
| **PDL(2)6M97** | .730 | 1.574 | .643 | 3.816 | -2.356 |
| **PDL(3)1A3** | 3.954 | 1.545 | .010 | 6.982 | .926 |
| **PDL(2)4H19** | -.964 | 1.533 | .529 | 2.040 | -3.968 |
| ***PDL(2)2C63*** | *-3.430* | *1.547* | *.027* | *-.398* | *-6.462* |
| **PDL(2)3F48** | 1.967 | 1.601 | .219 | 5.105 | -1.171 |
| **PDL(3)5K173** | 5.299 | 1.610 | .001 | 8.454 | 2.143 |
| **PDL(2)3F2** | 1.407 | 1.539 | .360 | 4.423 | -1.609 |
| **PDL(3)2D15** | -.106 | 1.631 | .948 | 3.090 | -3.302 |
| **PDL(3)3F38** | 1.151 | 1.529 | .451 | 4.147 | -1.845 |
| **PDL(3)5K32** | .544 | 1.547 | .725 | 3.576 | -2.488 |
| **PDL(3)5J23** | -1.275 | 1.590 | .423 | 1.841 | -4.391 |
| **PDL(2)1B1** | 1.229 | 1.580 | .437 | 4.325 | -1.867 |
| **PDL(2)2C5** | .958 | 1.544 | .535 | 3.983 | -2.067 |
| **PDL(3)2C37** | .437 | 1.590 | .783 | 3.553 | -2.678 |
| **PDL(3)5J100** | -1.630 | 1.545 | .292 | 1.399 | -4.658 |
| **PDL(3)2D38** | .949 | 1.548 | .540 | 3.982 | -2.085 |
| **PDL(2)2C24** | 4.695 | 1.573 | .003 | 7.779 | 1.612 |
| **PDL(3)4G7** | 2.145 | 1.559 | .169 | 5.201 | -.911 |
| **PDL(3)5J84** | 1.537 | 1.568 | .327 | 4.611 | -1.536 |
| ***PDL(3)5K14*** | *-3.043* | *1.535* | *.047* | *-3.535E-02* | *-6.051* |
| **PDL(3)3F94** | -2.180 | 1.596 | .172 | .949 | -5.308 |
| ***PDL(3)2D10*** | *-3.161* | *1.566* | *.044* | *-9.205E-02* | *-6.229* |
| **PDL(2)6L77** | -2.626 | 1.572 | .095 | .455 | -5.708 |
| ***PDL(2)5J42*** | *-5.492* | *1.590* | *.001* | *-2.376* | *-8.608* |
| **PDL(2)2C32** | 1.240 | 1.598 | .438 | 4.373 | -1.893 |
| **PDL(2)4G1** | -1.320 | 1.581 | .404 | 1.778 | -4.419 |
| **PDL(3)2D4** | 2.938 | 1.580 | .063 | 6.035 | -.160 |
| **PDL(3)5J86** | 3.622 | 1.590 | .023 | 6.737 | .506 |
| **PDL(2)3F13** | 6.559 | 1.657 | .000 | 9.808 | 3.310 |
| **PDL(2)6M54** | 2.404 | 1.602 | .134 | 5.544 | -.736 |
| **PDL(3)3F97** | .396 | 1.559 | .800 | 3.452 | -2.661 |
| **PDL(2)4G14** | 6.656 | 1.566 | .000 | 9.725 | 3.588 |
| **PDL(3)2C33** | 6.296 | 1.561 | .000 | 9.356 | 3.236 |
| **PDL(2)2C48** | 1.851 | 1.612 | .251 | 5.011 | -1.309 |
| **PDL(2)2D14** | -2.460 | 1.608 | .126 | .691 | -5.612 |
| **PDL(2)4H22** | 2.534 | 1.615 | .117 | 5.699 | -.631 |
| **PDL(2)6M149** | 3.201 | 1.572 | .042 | 6.283 | .120 |

*Based on estimated marginal means*

*The mean difference is significant at the .05 level.*

*Adjustment for multiple comparisons: Bonferroni.*

*Dependent Variable: LIFESPAN*

*Lines for which DOX- lives longer than DOX+ are italicized*

*Pairwise Comparisons for Data set #2 (lines crossed to rtTA(3)M1)*

|  | **Mean Difference**  **((+DOX) –**  **(-DOX))** | **Std. Error** | **Sig.** | **95% Confidence Interval for Difference** |  |
| --- | --- | --- | --- | --- | --- |
| **LINE#** |  |  |  | Lower Bound | Upper Bound |
| **PDL[3]791** | 1.707 | 1.553 | .272 | 4.751 | -1.338 |
| **PDL[3]7N57** | 2.272 | 1.560 | .145 | 5.329 | -.785 |
| **PDL[2]7971** | 2.417 | 1.554 | .120 | 5.463 | -.628 |
| **PDL[3]7975** | 1.444 | 1.573 | .358 | 4.527 | -1.639 |
| **PDL[3]7N13** | -.706 | 1.528 | .644 | 2.289 | -3.700 |
| **PDL[3]8S64** | 5.245 | 1.534 | .001 | 8.252 | 2.238 |
| **PDL[3]8R144** | 1.582 | 1.562 | .311 | 4.643 | -1.479 |
| **PDL[3]7P134** | 1.967 | 1.532 | .199 | 4.970 | -1.035 |
| **PDL[3]8S53** | 2.190 | 1.530 | .152 | 5.188 | -.809 |
| **PDL[3]8R4** | .633 | 1.578 | .688 | 3.726 | -2.459 |
| **PDL[3]8R25** | -.705 | 1.618 | .663 | 2.467 | -3.877 |
| **PDL[2]8R14** | 2.326 | 1.496 | .120 | 5.258 | -.606 |
| **PDL[3]8R129** | -.126 | 1.486 | .932 | 2.787 | -3.039 |
| **PDL[3]7P123** | 6.961 | 1.544 | .000 | 9.988 | 3.934 |
| **PDL[2]75P1** | -.187 | 1.524 | .902 | 2.799 | -3.173 |
| **PDL[2]8S25** | 4.085 | 1.524 | .007 | 7.071 | 1.099 |
| **PDL[3]8R128** | 4.658 | 1.601 | .004 | 7.797 | 1.520 |
| **PDL[3]8R139** | 3.170 | 1.556 | .042 | 6.221 | .119 |
| **PDL[2]8S35** | 2.254 | 1.571 | .151 | 5.332 | -.825 |
| **PDL[3]8S67** | 2.649 | 1.557 | .089 | 5.701 | -.404 |
| **PDL[2]7P126** | -.209 | 1.611 | .897 | 2.948 | -3.366 |
| **PDL[2]7P80** | 5.876 | 1.822 | .001 | 9.448 | 2.304 |
| **PDL[3]7N65** | 3.125 | 1.568 | .046 | 6.199 | 5.020E-02 |
| ***PDL[3]7N43*** | *-3.291* | *1.566* | *.036* | *-.221* | *-6.362* |
| **PDL[2]8R12** | .433 | 1.526 | .776 | 3.424 | -2.557 |
| **PDL[3]8R96** | 3.081 | 1.625 | .058 | 6.267 | -.104 |
| **PDL[2]8R125** | 2.092 | 1.727 | .226 | 5.478 | -1.294 |
| **PDL[2]7N33** | 1.327 | 1.500 | .376 | 4.267 | -1.613 |
| **PDL[3]7N5** | .794 | 1.492 | .595 | 3.718 | -2.130 |
| **PDL[3]8R39** | 1.852 | 1.505 | .219 | 4.803 | -1.099 |
| **PDL[2]7N48** | 2.517 | 1.494 | .092 | 5.444 | -.411 |
| **PDL[2]8S26** | 3.743 | 1.473 | .011 | 6.631 | .856 |
| **PDL[3]8R140** | -4.315E-02 | 1.503 | .977 | 2.904 | -2.990 |
| **PDL[3]7P128** | -2.149 | 1.494 | .150 | .779 | -5.076 |

*Based on estimated marginal means*

*The mean difference is significant at the .05 level.*

*Adjustment for multiple comparisons: Bonferroni.*

*Dependent Variable: LIFESPAN*

*Line for which DOX- lives longer than DOX+ is italicized.*
